# Supplementary material for: Gibson assembly: an easy way to clone potyviral full-length infectious cDNA clones expressing an ectopic VPg
Source: PubMed Central journal article supplement (PMC4475333; doi:10.1186/s12985-015-0315-3), 2015-06-14
Supplement: 12985_2015_315_MOESM2_ESM.pdf [file 12985_2015_315_MOESM2_ESM.pdf]

| Primer name    | Primer size (nt) | Fragment | Sequence 5'-3'                                                                     | Product size (kbp) |
|----------------|------------------|----------|------------------------------------------------------------------------------------|--------------------|
| <b>mch.fwd</b> | 63               | mch      | <u><b>GACGGGATGGCTGATGCAGTTCGACACCA</b></u> AGGCAAAGGTGTGAGCAAGGGCGAGG<br>AGGATAAC | 0.7                |
| <b>mch.rev</b> | 58               |          | <u><b>GAGCTTCTGTCTTTGCCGTTTACCTTTGCC</b></u> CTTGTACAGCTCGTCCATGCCGCCGGTG          |                    |
| <b>B.fwd</b>   | 30               | B        | <u><b>GGCAAAGGTAAACGGCAAAGACAGAAGCTC</b></u>                                       | 8.0                |
| <b>B.rev</b>   | 32               |          | <u><b>CATCTATTGCATAGGTAATCTTGACGTCGCA</b></u>                                      |                    |
| <b>A.fwd</b>   | 32               | A        | <u><b>TGCGACGTGCAAGATTACCTATGCAATAGATG</b></u>                                     | 8.2                |
| <b>A.rev</b>   | 30               |          | <u><b>TTGGTGTCGAACTGCATCAGCCATCCCGTC</b></u>                                       |                    |

**Additional file 2. Primers used for the LMVmchVPg cloning by homologous recombination in yeast.**

The regions of homology allowing recombination in yeast are underlined and indicated in bold. The suffixes “**fwd**” indicate sense primers, while suffixes “**rev**” indicate antisense primers. bp: base-pair, nt: nucleotide
