# Supplementary material for: Gibson assembly: an easy way to clone potyviral full-length infectious cDNA clones expressing an ectopic VPg
Source: PubMed Central journal article supplement (PMC4475333; doi:10.1186/s12985-015-0315-3), 2015-06-14

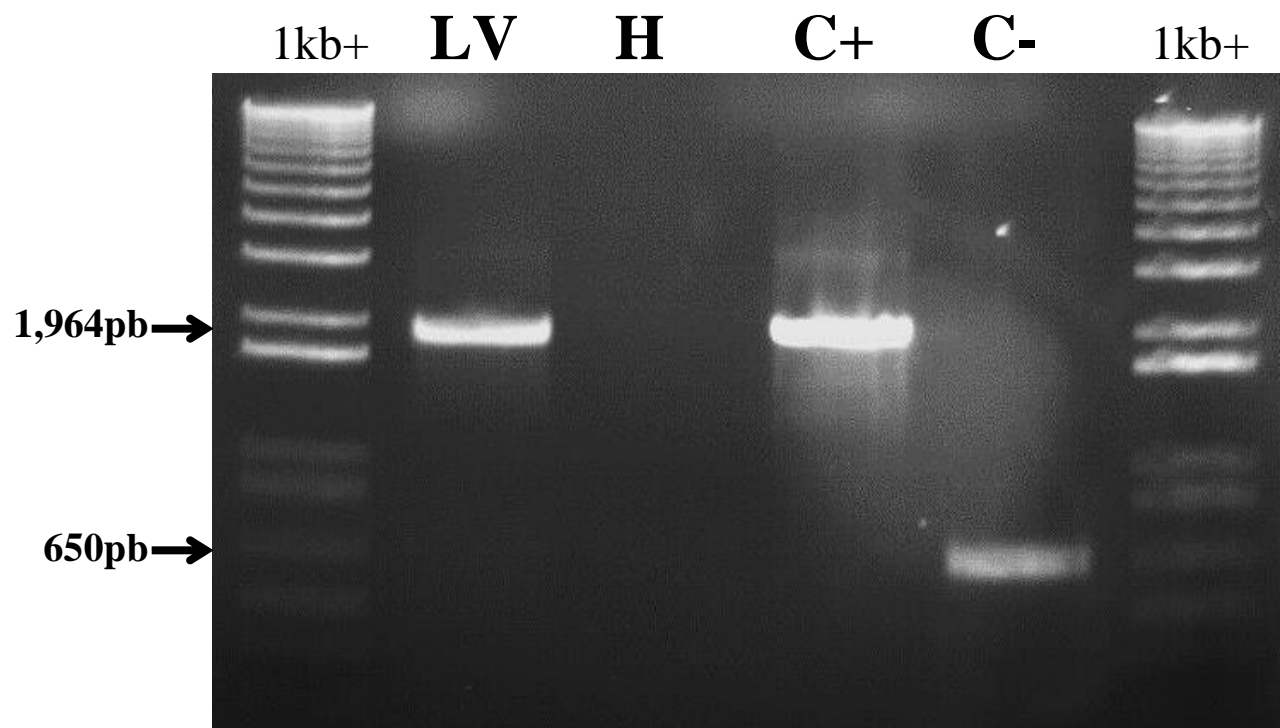

Supplement: 12985_2015_315_MOESM4_ESM.pdf [file 12985_2015_315_MOESM4_ESM.pdf]
