# Supplementary material for: Gibson assembly: an easy way to clone potyviral full-length infectious cDNA clones expressing an ectopic VPg
Source: PubMed Central journal article supplement (PMC4475333; doi:10.1186/s12985-015-0315-3), 2015-06-14
Supplement: 12985_2015_315_MOESM6_ESM.pdf [file 12985_2015_315_MOESM6_ESM.pdf]

**Step 1 : Long distance PCR of overlapping fragments**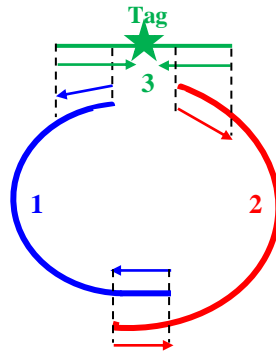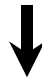**Step 2 : Gibson Assembly reaction**

Example: Fragments 1 and 2

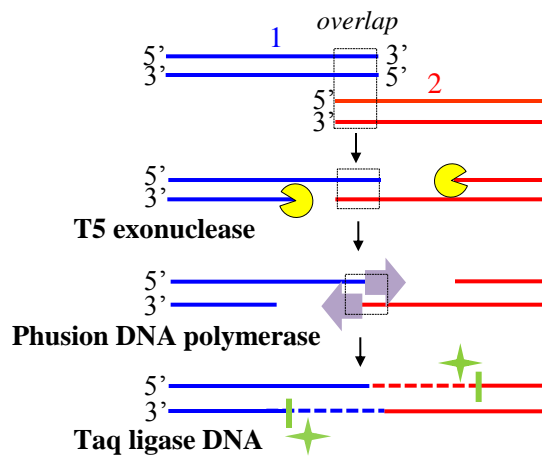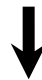**Step 3 : *E.coli* transformation**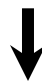**Step 4 : Plasmid extraction**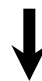**Step 5 : Plant inoculation**
